# Supplementary material for: Surface-engineered vanadium nitride nanosheets for an imaging-guided photothermal/photodynamic platform of cancer treatment
Source: Royal Society of Chemistry journal article supplement (doi:10.1039/c8nr08269c), 2018-12-27
Supplement: c8nr08269c1.pdf [file c8nr08269c1.pdf]

## **Surface engineered vanadium nitride nanosheets for imaging-guided photothermal/photodynamic platform of cancer treatment**

*Chunyu Yang,<sup>a#</sup> Huahai Yu,<sup>a#</sup> Yan Gao,<sup>a</sup> Wei Guo,<sup>b</sup> Zizuo Li,<sup>c</sup> Yaodong Chen,<sup>c</sup> Qinmin Pan,<sup>a</sup> Mingxing Ren,<sup>\*b</sup> Xiaojun Han,<sup>\*a</sup> Chongshen Guo<sup>\*a,b</sup>*

<sup>a</sup>School of Chemistry and Chemical Engineering, Harbin Institute of Technology, Harbin, 150001, China

Email: chongshenguo@hit.edu.cn (Chongshen Guo); hanxiaojun@hit.edu.cn (Xiaojun Han)

<sup>b</sup>Key Laboratory of Micro-systems and Micro-structures Manufacturing (Ministry of Education), Academy of Fundamental and Interdisciplinary Sciences, Harbin Institute of Technology, Harbin, 150080, China

E-mail: renmx@aliyun.com

<sup>c</sup>Department of Abdominal Ultrasonography, The First Affiliated Hospital of Harbin Medical University, Harbin, 150001, China.

**# Equal contribution from Chunyu Yang and Huahai Yu**

## Experimental

### Calculation of the photothermal conversion efficiency

The photothermal conversion efficiency ( $\eta$ ) of VNPBs nanosheets was calculated according to the established method.

$$\eta = \frac{hA(T_{\max} - T_{\text{surr}}) - Q_{\text{dis}}}{I(1 - 10^{-A_{\lambda}})} \quad \text{Equation S1}$$

In the Equation S1,  $T_{\max}$  and  $T_{\text{surr}}$  are the equilibrium and ambient temperature, respectively.  $h$  is the heat transfer coefficient,  $A$  is the surface area of the quartz tube,  $Q_{\text{dis}}$  represents heat dissipation from the sample dispersion in quartz cell to the surroundings,  $I$  is power of incident laser,  $A_{\lambda}$  is the absorbance of VNPBs solution at 1064 nm. Thus, only the  $hA$  remains unknown.

To obtain  $hA$ , it introduced a dimensionless driving force temperature ( $\theta$ ). The cooling time  $t$  and  $\theta$  abide by the following Equation S2 and S3 at the cooling stage of VNPBs solution. Hence, time constant ( $\tau_s$ ) for heat transfer could be determined and the value of  $hA$  is obtained according to Equation S4.

$$\theta = \frac{T - T_{\text{surr}}}{T_{\max} - T_{\text{surr}}} \quad \text{Equation S2}$$

$$t = -\tau_s \ln(\theta) \quad \text{Equation S3}$$

$$hA = \frac{\sum m_D C_D}{\tau_s} \quad \text{Equation S4}$$

Where  $m_D$  is the mass of water and  $C_D$  means the heat capacity of water.

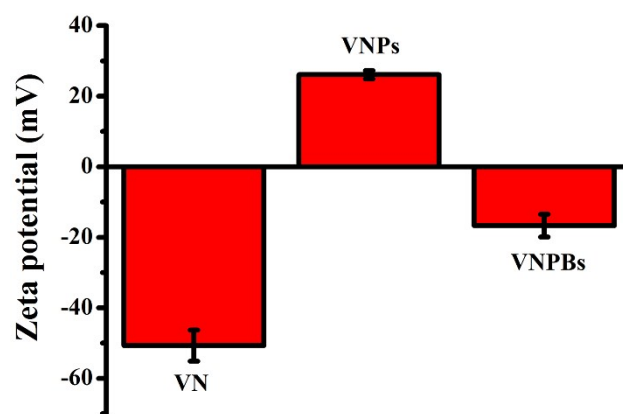

**Fig. S1** Zeta potentials of VN, VNPs, VNPBs nanosheets.

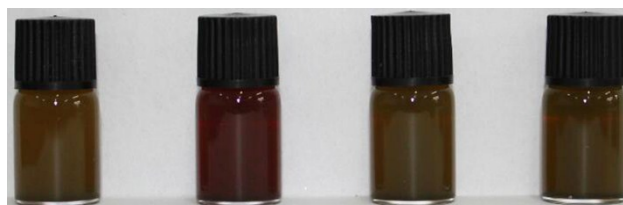

**Fig. S2** Photographs of VNPBs nanosheets dispersed in deionized water, DMEM, PBS and FBS, respectively.

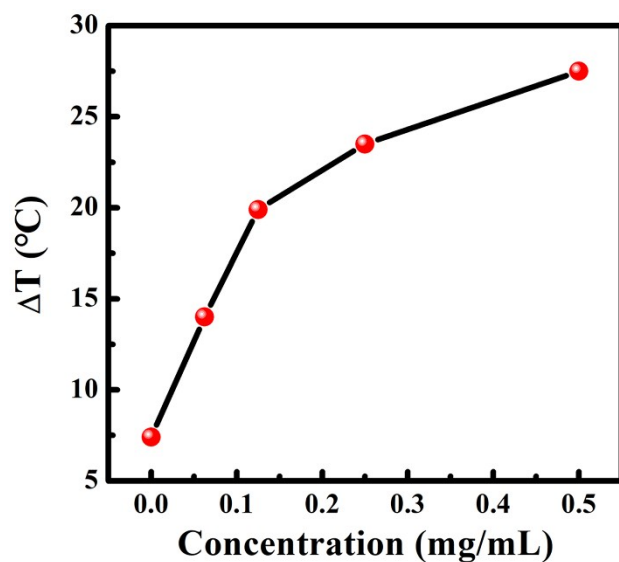

**Fig. S3** Plot of temperature change ( $\Delta T$ ) versus the different concentrations of VNPBs nanosheets during the period of 10 min irradiation.

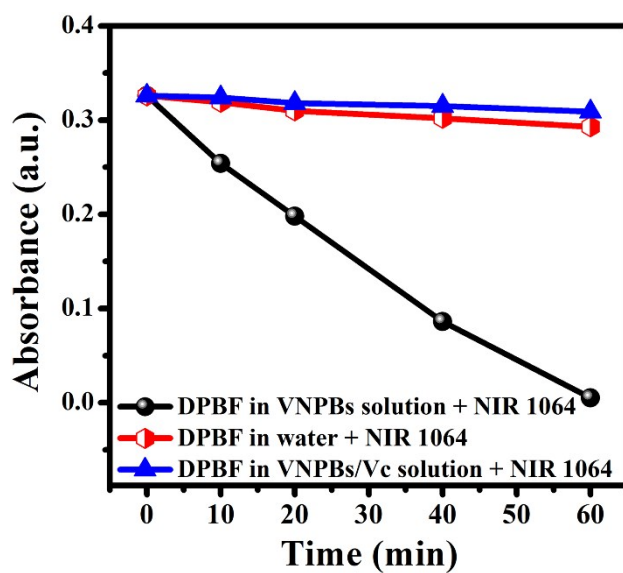

**Fig. S4** Absorption spectra of DPBF in deionized water and VNPBs nanosheets with/without Vc after various irradiation times.

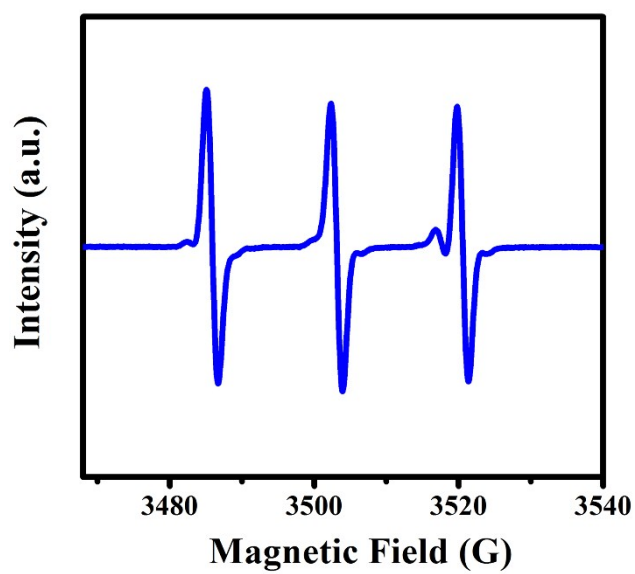

**Fig. S5** ESR spectra of VNPBs nanosheets with TEMP probes under 10 min irradiation.

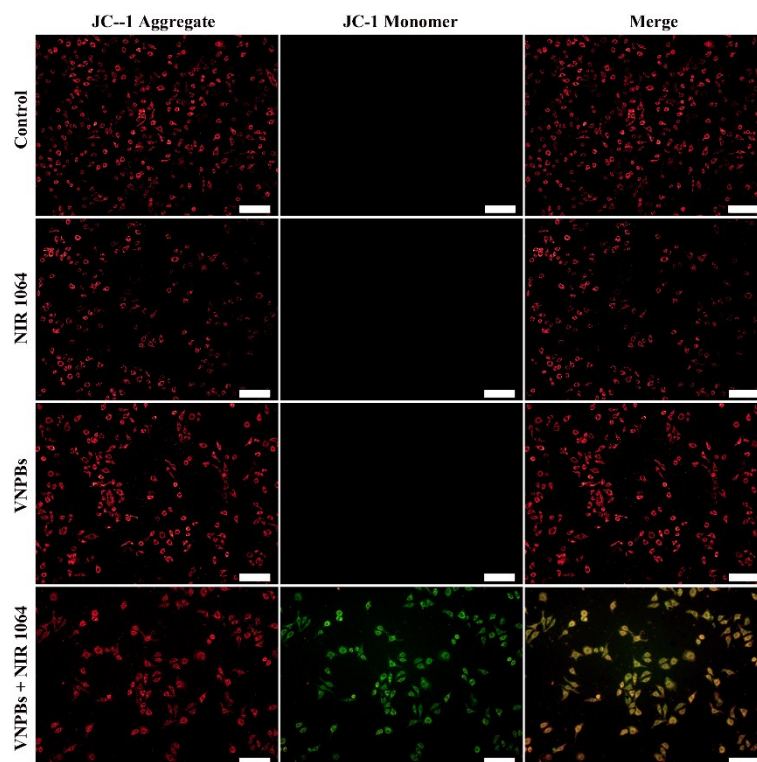

**Fig. S6** Detection for mitochondrial membrane potential after different treatments by JC-1 staining. (Scale bar = 100  $\mu\text{m}$ .)

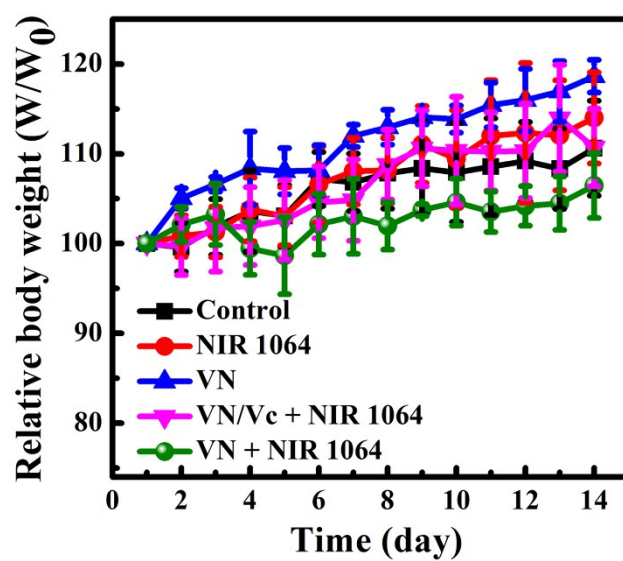

**Fig. S7** Variation of relative body weight of mice after different treatments during 14 days.

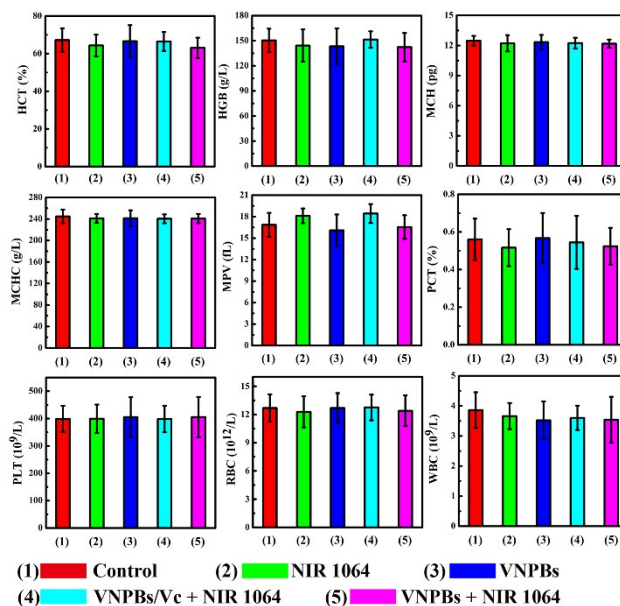

**Fig. S8** The hematological analyse for different treatment groups of mice at 14<sup>th</sup> day.
